# Supplementary material for: Arrestins function in cAR1 GPCR-mediated signaling and cAR1 internalization in the development of Dictyostelium discoideum
Source: PubMed Central journal article supplement — Mol Biol Cell. 2014 Oct 15;25(20):3210–21. doi: 10.1091/mbc.E14-03-0834 (PMC4196870; doi:10.1091/mbc.e14-03-0834), 2014-10-15

# Supplemental Materials

*Molecular Biology of the Cell*

Cao et al.

### Supplemental Figure Legends

**Figure S1. Domain structure of three *Dictyostelium* arrestin homologs.** (A) Analysis of the *D. discoideum* genome sequence revealed three arrestin homologs containing both Arrestin-N and Arrestin-C domains, named AdcA-C. In addition to Arrestin-N and Arrestin-C domains present in all three homologs, other motifs identified include: C2 domain (phospholipid binding site), SAM protein interaction module (for homo- and hetero-oligomerization with other SAM domains), TM (putative transmembrane domain), and FYVE (phosphatidylinositol 3-phosphate binding domain). The % similarities of the Arrestin –N and Arrestin-C domains of the three *Dictyostelium* arrestins are shown. (B) Protein alignment between AdcB and AdcC were performed using software of ClustalX1.83.

**Figure S2. Generation of arrestin null cells.** (A) Disruption of arrestin genes was achieved by homologous recombination using a selectable Blasticidin resistance (BSR) marker. (B) The double disruption of *adcB* and *adcC* was accomplished using the Cre-LoxP system. Following the first disruption, Blasticidin sensitivity was restored by introducing Cre recombinase to excise the LoxP-flanked BSR cassette, leaving stop codons in the disrupted gene. By recycling the selectable marker in this manner, *adcB*<sup>−</sup>*C*<sup>−</sup> cell line was generated. (C) PCR screening with primers flanking each gene demonstrates the expected ~1.3 kb size increase of PCR products in null cells.

**Figure S3. Development of arrestin null cells on bacterial lawns.** Wild-type, *adcB*<sup>−</sup>, *adcC*<sup>−</sup>, *adcB*<sup>−</sup>*C*<sup>−</sup> and *adcB*<sup>−</sup>*C*<sup>−</sup> cells expressing AdcB -YFP or AdcC -YFP were grown in association with *Klebsiella aerogenes* at 22 °C. Photographs were taken after 5 days.

**Figure S4. AdcB does not translocate to plasma membrane upon cAMP stimulation.** (A) *adcB*<sup>−</sup> cells expressing AdcB-YFP were stimulated with 10 μM cAMP. Images were captured and frames in the YFP channel at selected time points are shown. The scale bar represents 5 μm. The kinetics of the time course is graphed in (B). Means (n = 5) and SDs are shown.

**Figure S5. cAR1 associates with AdcC.** (A) Lysates of RI9 cells co-expressing AdcC-mCherry and cAR1-YFP, cm1234-YFP or YFP tag were incubated with beads coupled with anti-GFP antibody for co-IP assays. Elutes were analyzed by immunoblotting using anti-GFP to detect cAR1-YFP, cm1234-YFP or YFP tag (upper panel) and anti-RFP antibody to detect AdcC-mCherry (lower panel) respectively. As control, 5% of the total volumes of the lysates used for the co-IP reactions were also included (input, lane I). (B) Co-IP of cm1234 compared to wild type cAR1 in the absence of cAMP. AdcC-mCherry band of cm1234-YFP (without cAMP stimulation) in Figure 3A was measured by ImageJ and normalized with the level of cAR1-YFP (without cAMP stimulation). Results represent the mean  $\pm$  SD of three independent experiments. Statistical significance was assessed by t-test,  $P = 0.09$ .

**Figure S6. Proteins that associate with AdcC.** (A) Identification of proteins that associate with AdcC. Cells expressing AdcC-YFP-TAP or YFP-TAP (as a control) were stimulated with 0 or 50  $\mu$ M cAMP, suspended in lysis buffer, and then incubated with beads coupled to anti-GFP antibody. After incubation, the beads were washed, and then eluted proteins were subjected to protein gel electrophoresis. Shown is a representative protein gel stained with Coomassie blue. Protein bands were excised for mass spectrometry analysis. (B) A partial list of proteins identified by mass spectrometry that associate with AdcC are shown. (C) AdcC associates with ERK2. Lysates of *adcC*<sup>-</sup> cells co-expressing RFP-ERK2 and AdcC-YFP or YFP tag (as a control) were incubated with beads coupled with anti-RFP antibody for immunoprecipitation assays. Elutes (lane IP) were subjected to SDS gel electrophoresis and analyzed by immunoblotting using anti-RFP antibody to detect RFP-ERK2 (upper panel) and anti-GFP to detect AdcC-YFP or YFP tag (lower panel) respectively. 5% of the total lysates were reserved to show input levels (lane I).

**Figure S7.** (A) cAR1 levels are the same in developed wild-type and *adcB*<sup>-</sup>*C*<sup>-</sup> cells. Lysates of 6-h developed wild-type and *adcB*<sup>-</sup>*C*<sup>-</sup> cells were subjected to SDS gel electrophoresis and analyzed by immunoblotting using anti-cAR1 antibody. (B) The level of ERK2 is similar in developed wild-type, *adcB*<sup>-</sup>*C*<sup>-</sup>, and *adcB*<sup>-</sup>*C*<sup>-</sup> expressing AdcC-YFP cells. Cells were developed for 6 hr. The lysates were subjected to SDS gel electrophoresis and the total ERK2 level was analyzed by immunoblotting using

anti-ERK antibody. (C-D) Load control showing the linearity in exposure of anti-pERK2 blots. The peak 1 min time point was loaded as shown in Figures 4B and C and then at  $\frac{1}{2}$  and  $\frac{1}{4}$  amount of the initial load. Blots were probed and exposed as in Figure 4 and band intensities were quantified and graphed in D with the  $R^2$  value reported.

**Figure S8. cAR1-induced ERK2 phosphorylation in *adcB*<sup>-</sup> and *adcC*<sup>-</sup> mutant cells.** (A-B) The kinetics of ERK2 activation in developed wild-type, *adcB*<sup>-</sup>, and *adcC*<sup>-</sup> cells in response to a 1  $\mu$ M or 50  $\mu$ M cAMP stimulation was examined. ERK2 activation was assessed by immunoblotting with anti-phospho-ERK2 (pERK2) antibody. Western blots for actin were used as loading control. The level of pERK2 was normalized to the peak value at 1 min. The kinetics of the time course is graphed in (C-D). Results represent the mean  $\pm$  SD of three independent experiments.

**Figure S9. cAMP oscillations in arrestin null cells.** (A-E) cAMP oscillations were observed in the wild-type, *adcB*<sup>-</sup>, *adcC*<sup>-</sup>, *adcB*<sup>-</sup>*C*<sup>-</sup>, and *adcB*<sup>-</sup>*C*<sup>-</sup> cells expressing AdcC-YFP during early development by capturing dark field images every 1 min with a stereo microscope. Time plots were generated by measuring intensity changes in the frame-subtracted image sequence. (F) The period of cAMP oscillation was analyzed with 3 mounts per movie and graphed. Means (n = 3) and SDs are shown. Statistical significance was assessed by t-test, \*\*P<0.01. Independent experiments were performed at least twice. (note that the data of wild-type, *adcB*<sup>-</sup>*C*<sup>-</sup>, and *adcB*<sup>-</sup>*C*<sup>-</sup> cells expressing AdcC-YFP are also shown in Figure 5).

**Figure S10.** (A-B) Additional examples for data shown in Figure 6A and 6B. Wild-type, *adcB*<sup>-</sup>, *adcC*<sup>-</sup>, and *adcB*<sup>-</sup>*C*<sup>-</sup> cells expressing cAR1-YFP were stimulated with 50  $\mu$ M cAMP. The internalization of cAR1-YFP was imaged using confocal microscopy and photographs were taken before and 1 hr after stimulation. (note that the data of wild-type and *adcB*<sup>-</sup>*C*<sup>-</sup> cells expressing cAR1-YFP are also shown in Figure 6). (C) Additional examples for data shown in Figure 6C. cAR1-YFP is localized on the post-lysosomes after internalization. Wild-type cells expressing cAR1-YFP were stimulated with 50  $\mu$ M

cAMP for 1h, fixed, and processed for immunofluorescence assay with anti-p80. Co-localization of cAR1-YFP and p80 is indicated by arrows. The scale bar represents 5  $\mu\text{m}$ . (D) Additional examples for Figure 6D. cm1234 is defective in internalization. Wild-type cells expressing cm1234-YFP were stimulated with 300  $\mu\text{M}$  cAMP and images were captured at 0 and 2 hr post-stimulation.

**Figure S11.** (A) cAR1-YFP does not co-localize with p80-positive vesicle in *adcB<sup>-</sup>C<sup>-</sup>* cells. *adcB<sup>-</sup>C<sup>-</sup>* cells expressing cAR1-YFP were stimulated with 50  $\mu\text{M}$  cAMP for 1h, fixed, and processed for immunofluorescence assay with anti-p80. The scale bar represents 5  $\mu\text{m}$ . (B) cAMP-induced AdcC membrane translocation requires  $\text{Ca}^{2+}$ . *adcC<sup>-</sup>* cells expressing AdcC-YFP in DB buffer were stimulated with 10  $\mu\text{M}$  cAMP. The kinetics of the time course is graphed in (C). Means ( $n = 5$ ) and SDs are shown. (D) *adcC<sup>-</sup>* cells expressing AdcC-YFP that have been incubated in PM buffer ( $\text{Ca}^{2+}$  free) were stimulated with 10  $\mu\text{M}$  cAMP. The kinetics of the time course is graphed in (E). Means ( $n = 5$ ) and SDs are shown.

**Movie 1. EZ-Taxiscan chemotaxis assay of wild-type cells.** Developed wild-type cells are moving in a linear cAMP gradient that ranges from 0-1  $\mu\text{M}$  cAMP. Frames were taken every 15 secs. The source of cAMP is at the bottom of the frame in the movies.

**Movie 2. EZ-Taxiscan chemotaxis assay of *adcB<sup>-</sup>C<sup>-</sup>* cells.** Developed *adcB<sup>-</sup>C<sup>-</sup>* cells are moving in a linear cAMP gradient that ranges from 0-1  $\mu\text{M}$  cAMP. Frames were taken every 15 secs. The source of cAMP is at the bottom of the frame in the movies.

A

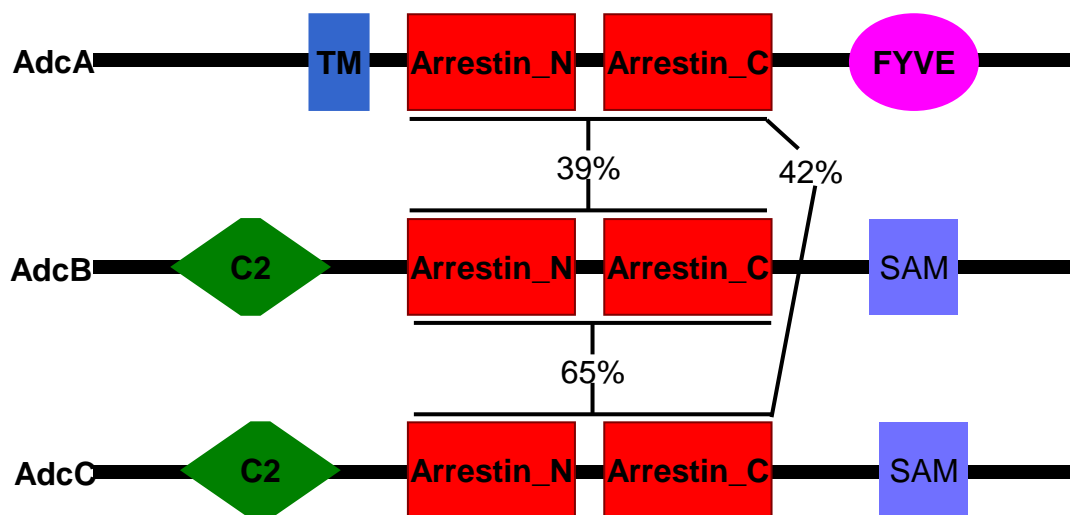

B

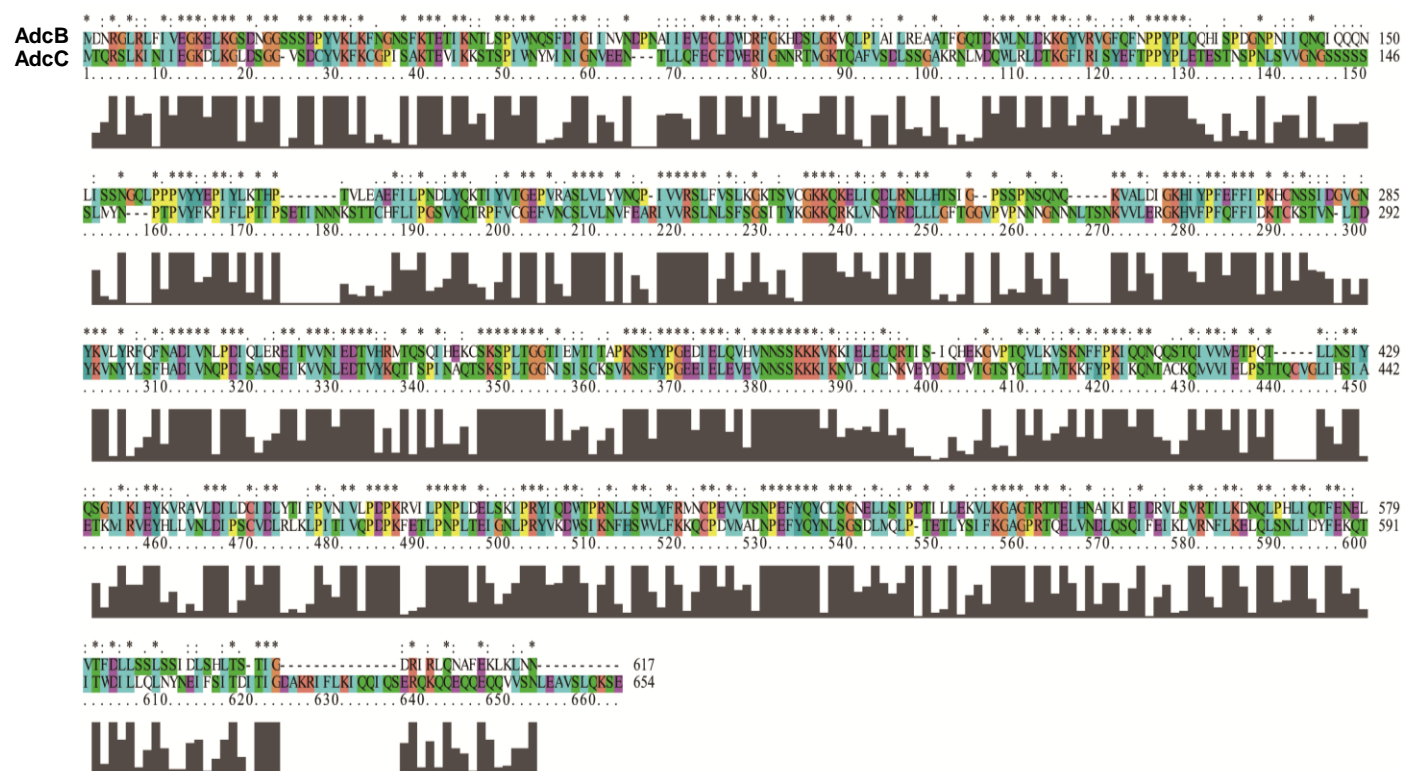

**A**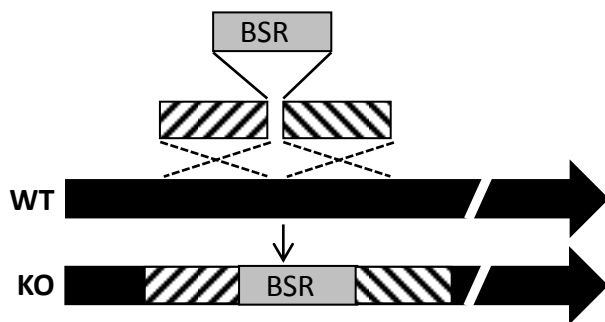**B**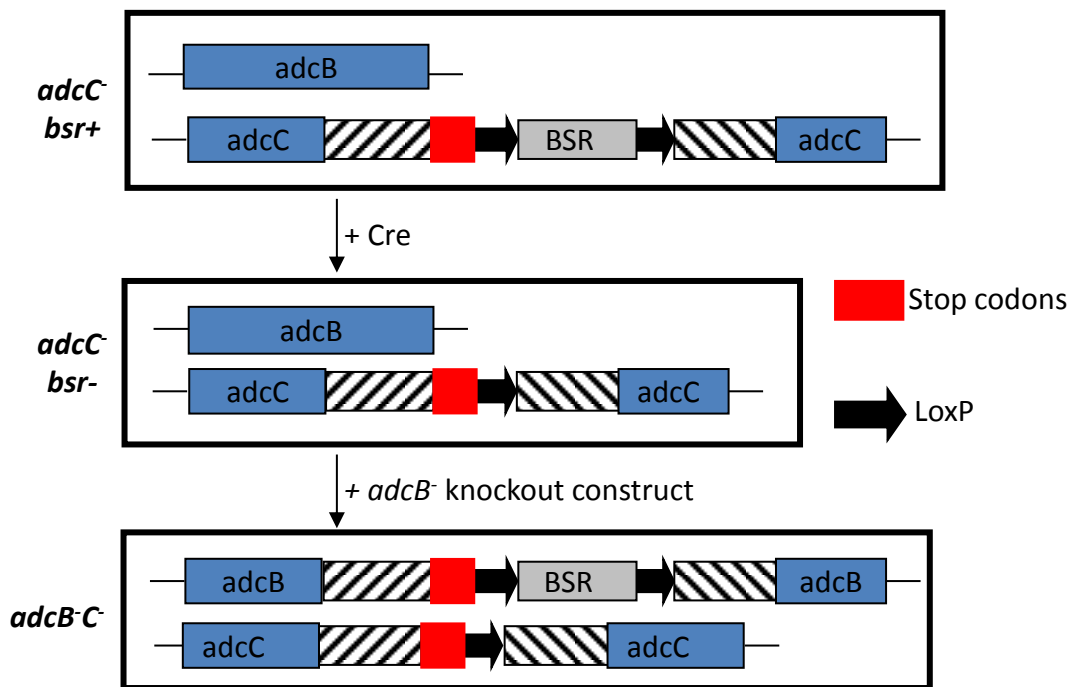**C**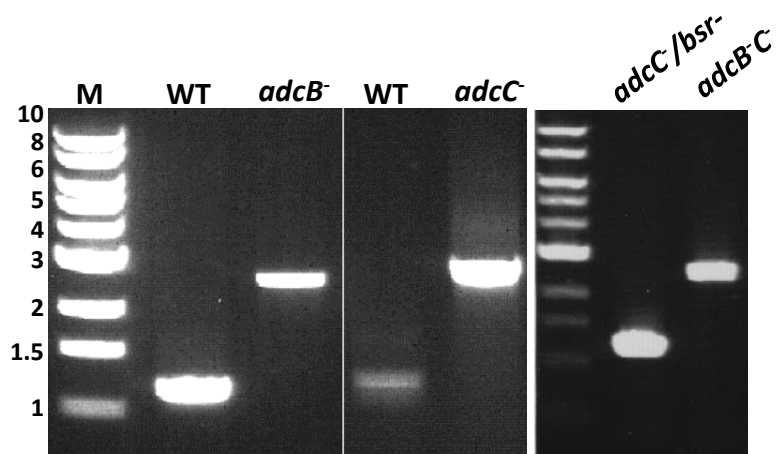

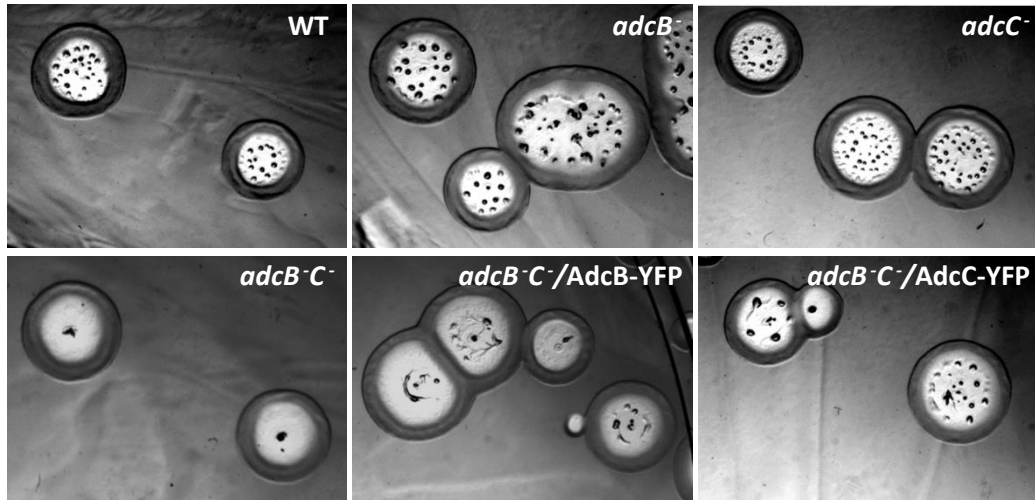

**A***adcB*/AdcB-YFP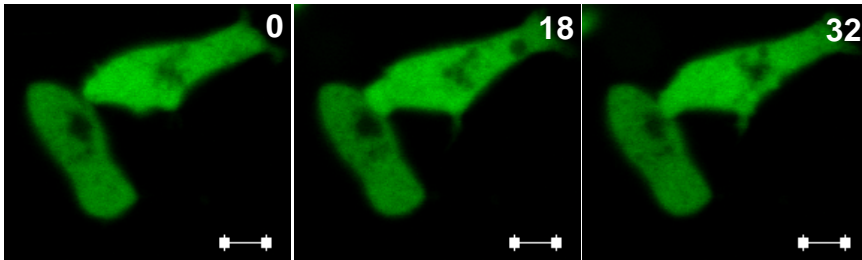**B**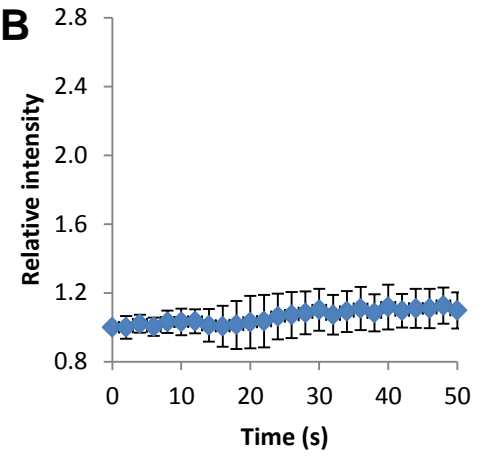

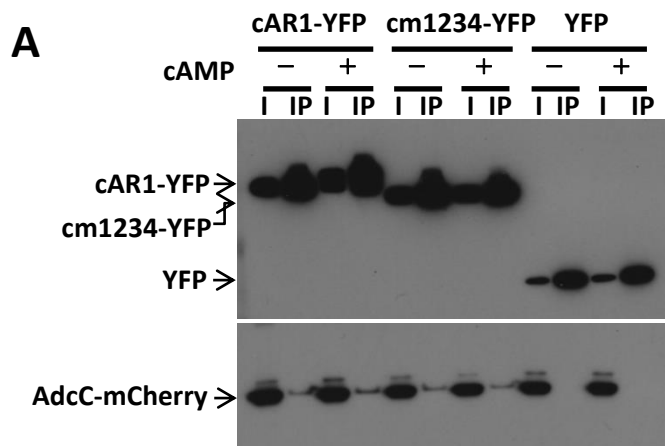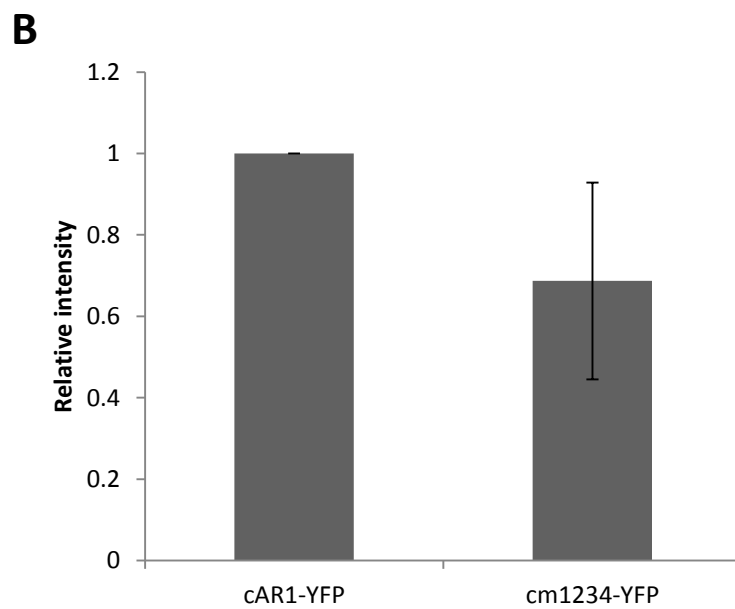

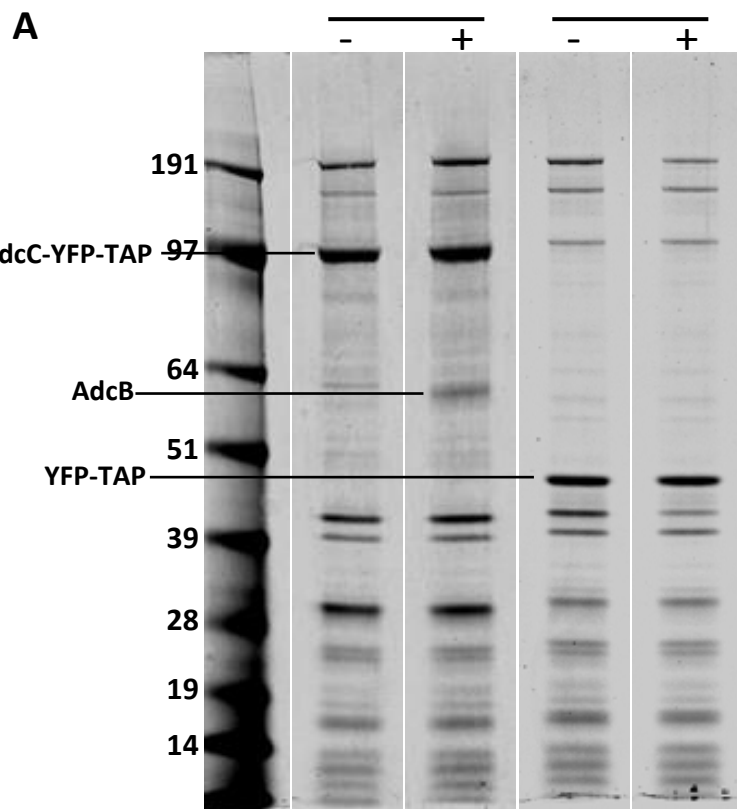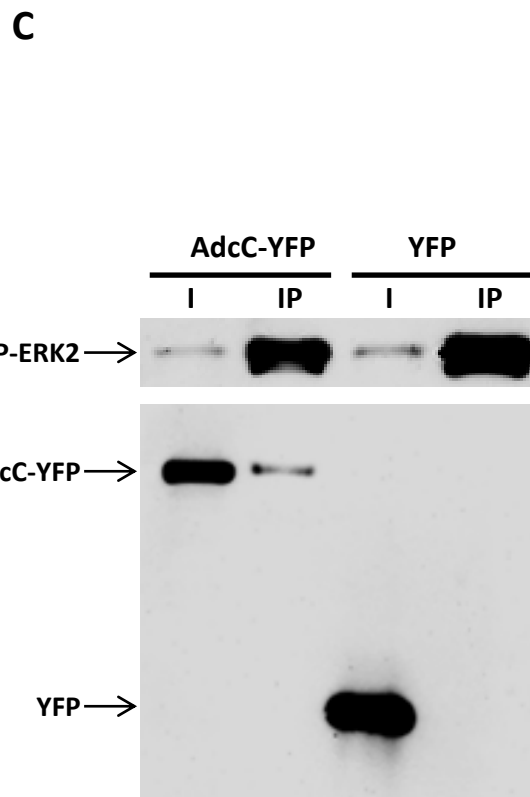

**B**

| MW (k Da) | Gene ID      | Gene Name    | Gene product                         | No. of Unique Peptides |               |              |                  |
|-----------|--------------|--------------|--------------------------------------|------------------------|---------------|--------------|------------------|
|           |              |              |                                      | AdcC+cAMP              | AdcC w/o cAMP | control+cAMP | control w/o cAMP |
| 74.2      | DDB_G0271022 | adcC         | Arrestin Domain-Containing protein   | 38                     | 33            | 0            | 0                |
| 70.1      | DDB_G0274395 | adcB         | Arrestin Domain-Containing protein   | 25                     | 20            | 0            | 0                |
| 64.5      | DDB_G0292924 | adcA         | Arrestin Domain-Containing protein   | 2                      | 0             | 0            | 0                |
| 193.5     | DDB_G0277221 | chcA         | clathrin heavy chain                 | 7                      | 0             | 0            | 0                |
| 99.6      | DDB_G0281957 | ap1g1        | clathrin-adaptor gamma chain         | 1                      | 0             | 0            | 0                |
| 424.8     | DDB_G0285063 | DDB_G0285063 | putative E3 ubiquitin-protein ligase | 6                      | 0             | 0            | 0                |
| 64.4      | DDB_G0278981 | DDB_G0278981 | E3 ubiquitin-protein ligase          | 1                      | 0             | 0            | 0                |
| 42.0      | DDB_G0283903 | erkB         | ERK2                                 | 1                      | 1             | 0            | 0                |

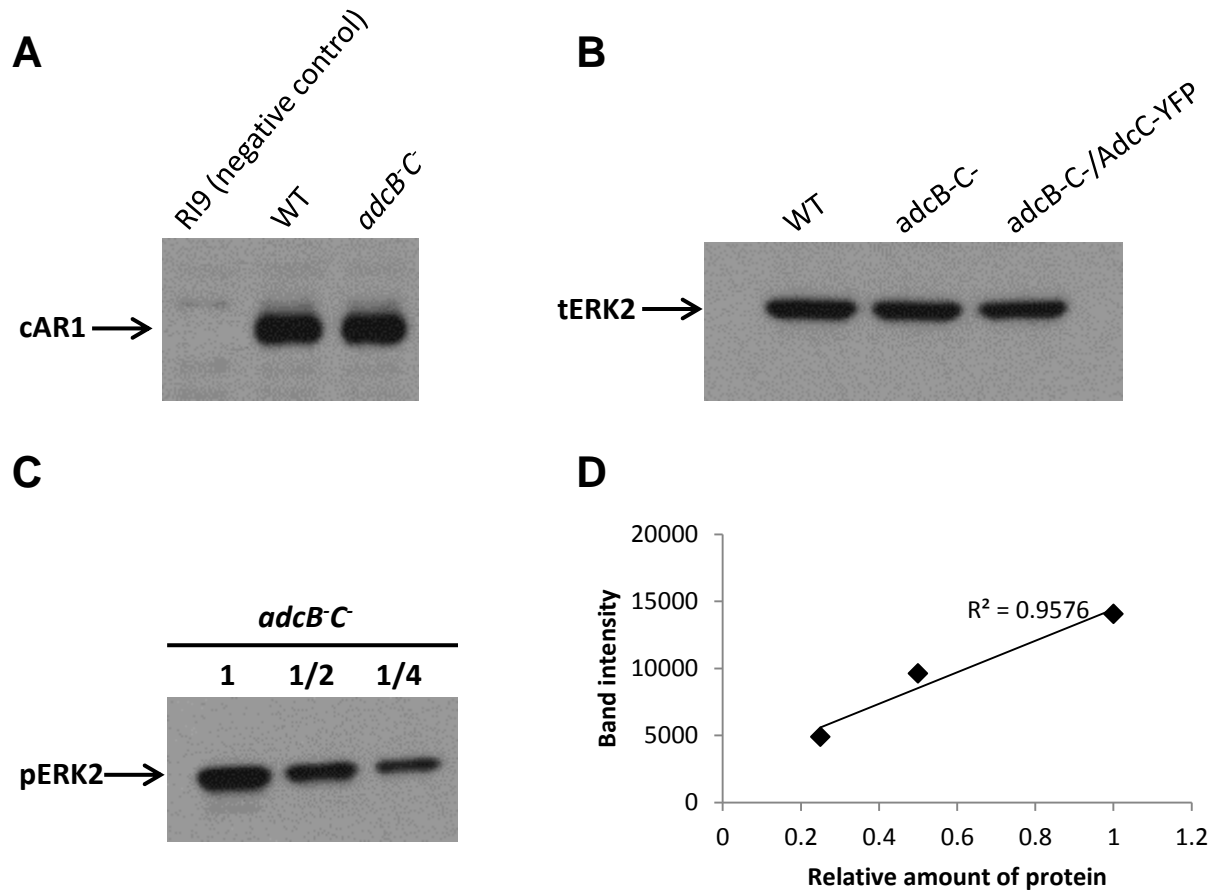

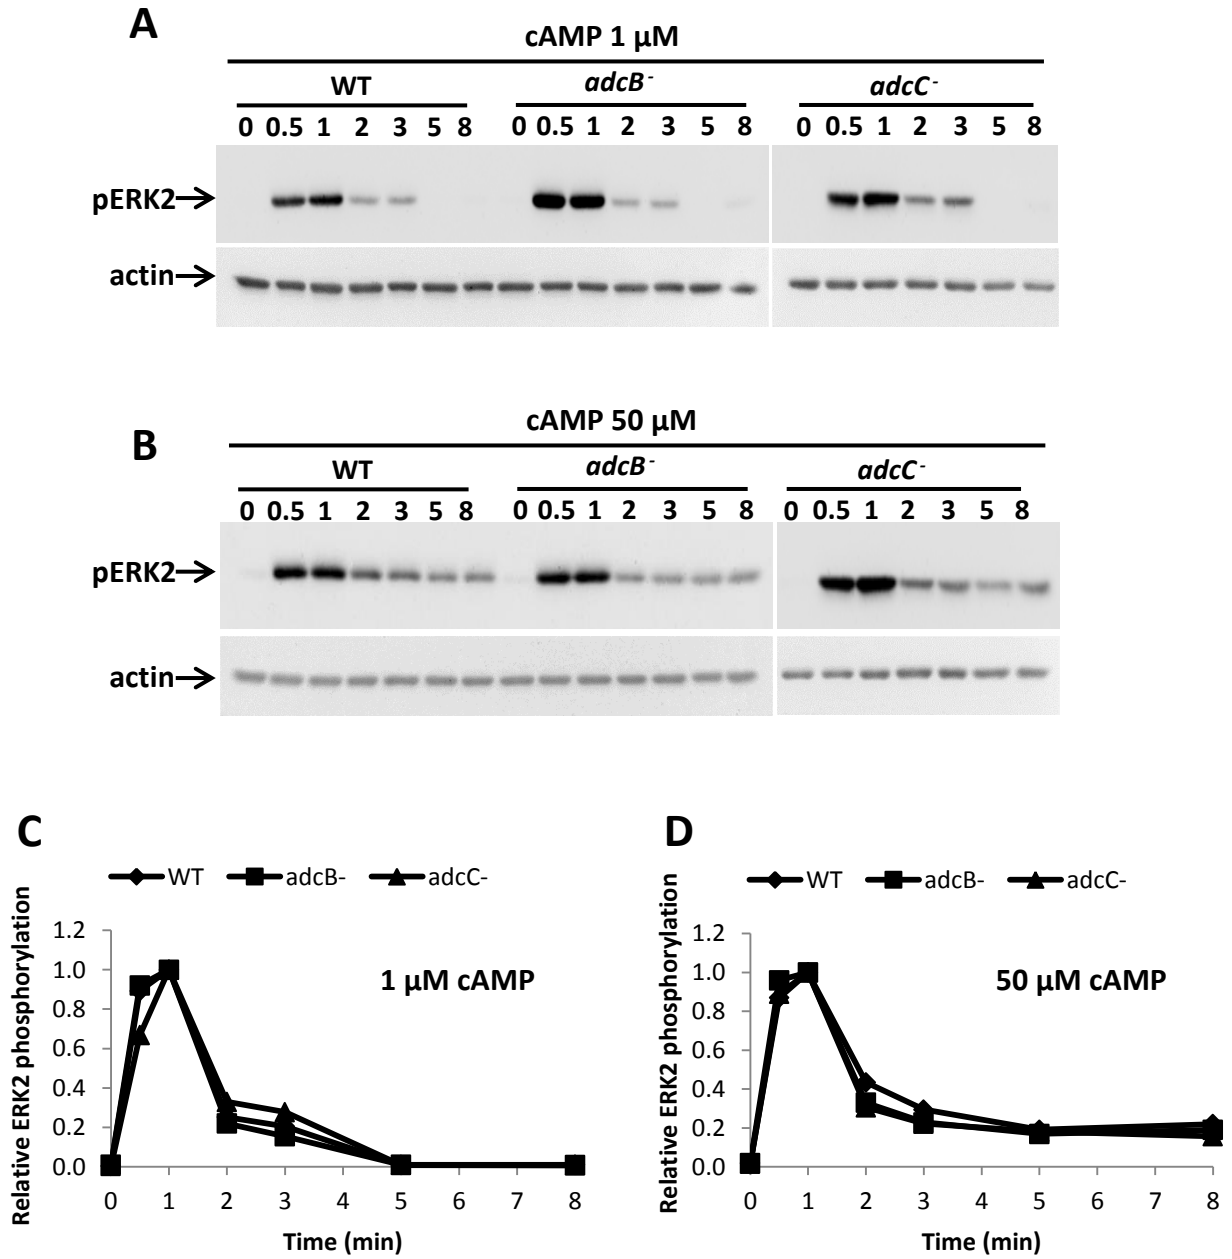

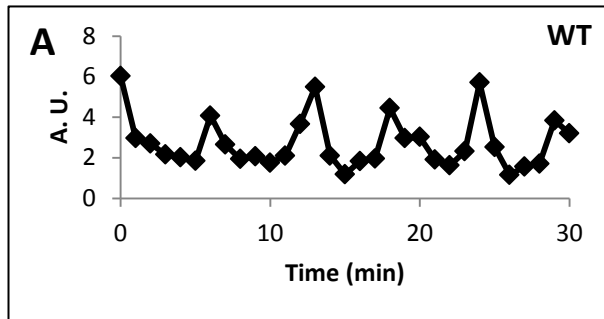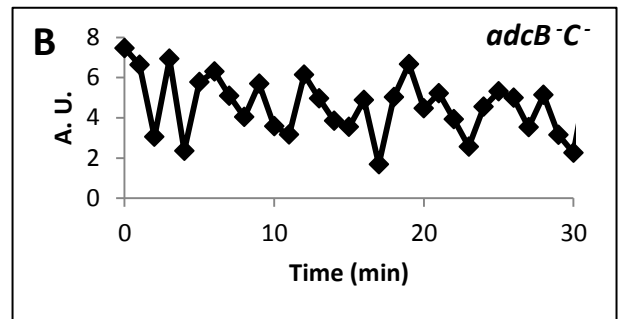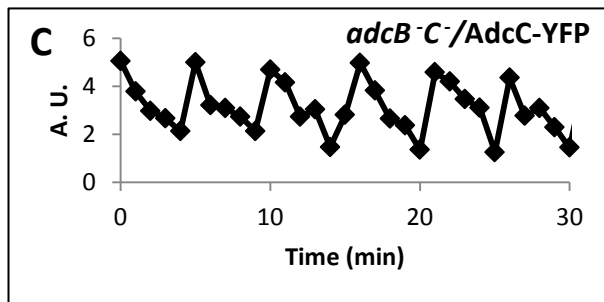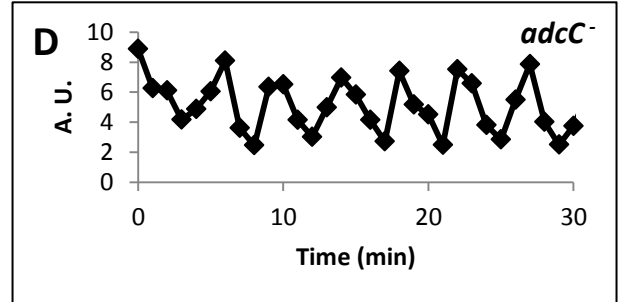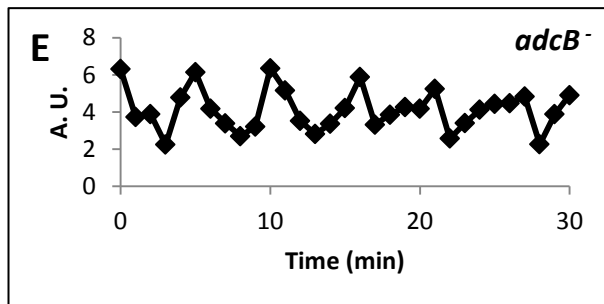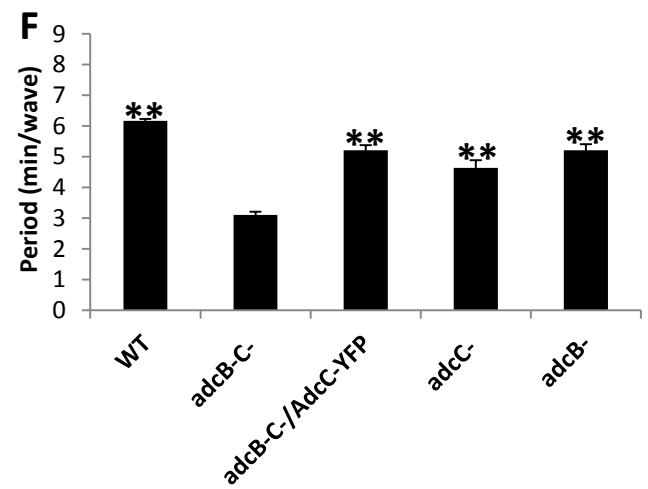

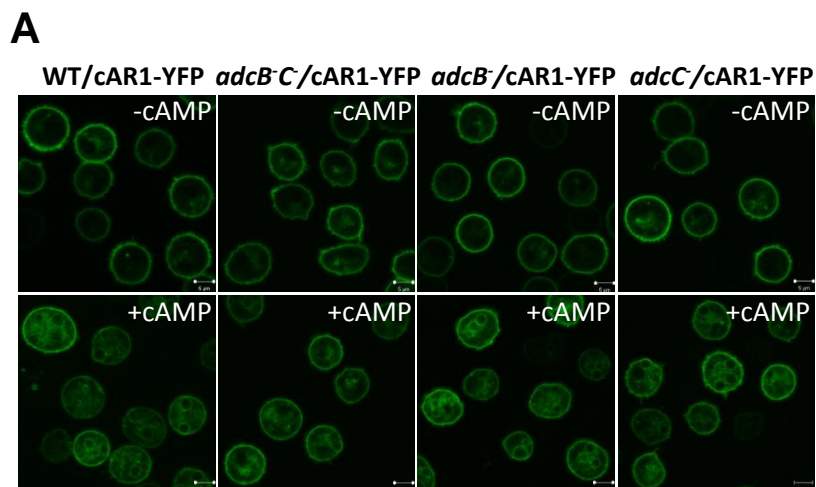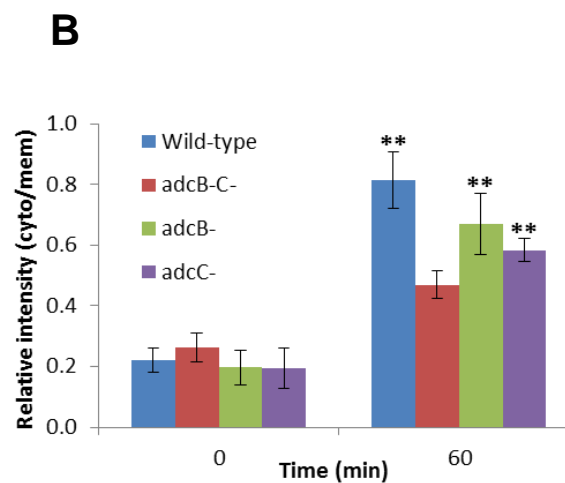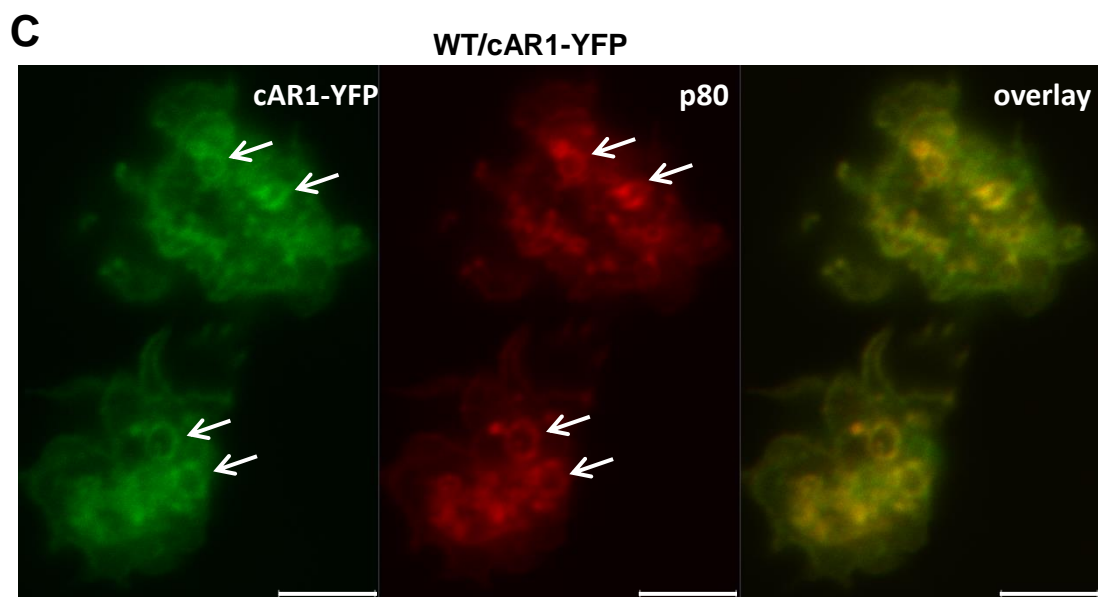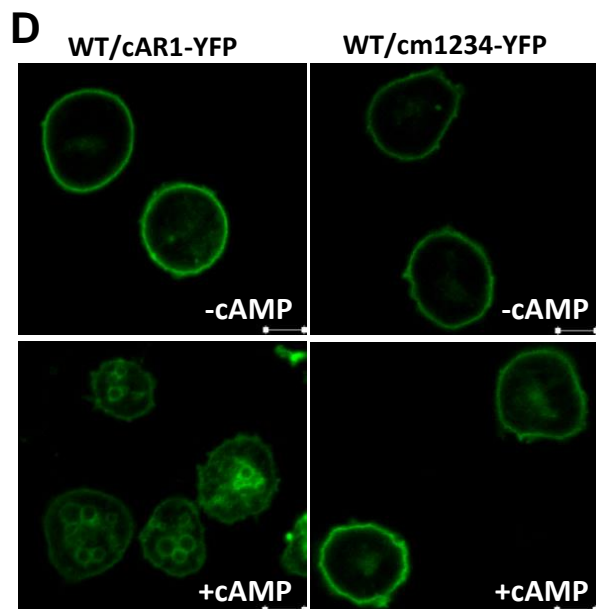

**A***adcB*-C/cAR1-YFP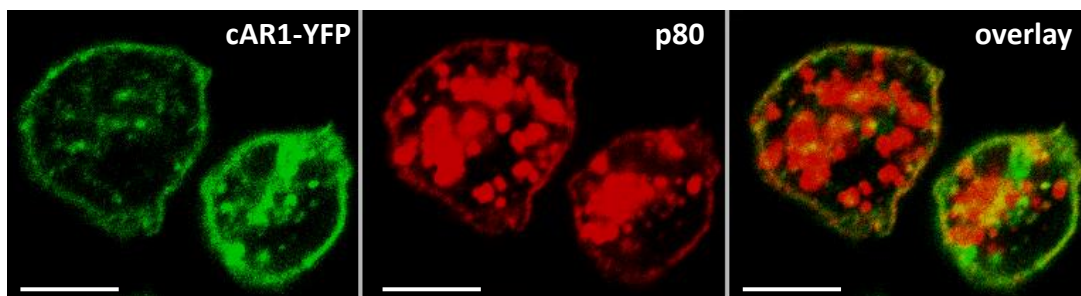**B**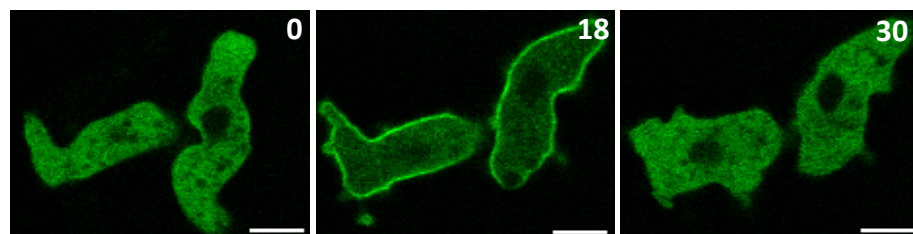**C**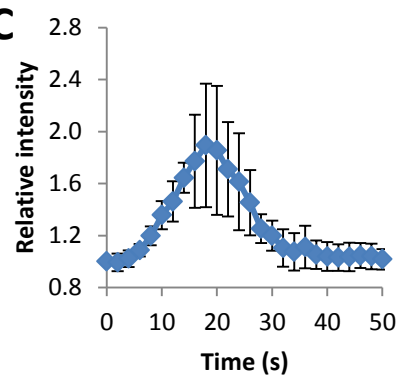**D**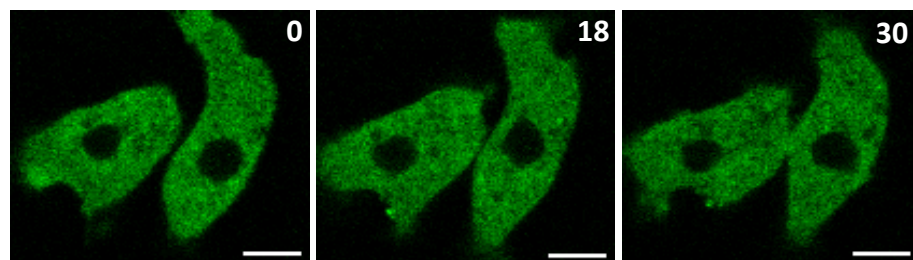**E**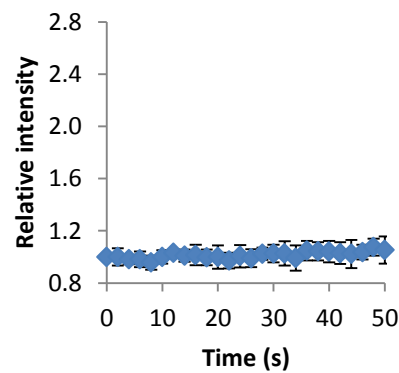

Supplement: supp_E14-03-0834v1_CombinedSupMats.pdf [file supp_E14-03-0834v1_CombinedSupMats.pdf]
